# Supplementary material for: Multiple drug resistance in hookworms infecting greyhound dogs in the USA
Source: PubMed Central journal article supplement — Int J Parasitol Drugs Drug Resist. 2021 Sep 2;17:107–17. doi: 10.1016/j.ijpddr.2021.08.005 (PMC8426179; doi:10.1016/j.ijpddr.2021.08.005), 2021-09-02

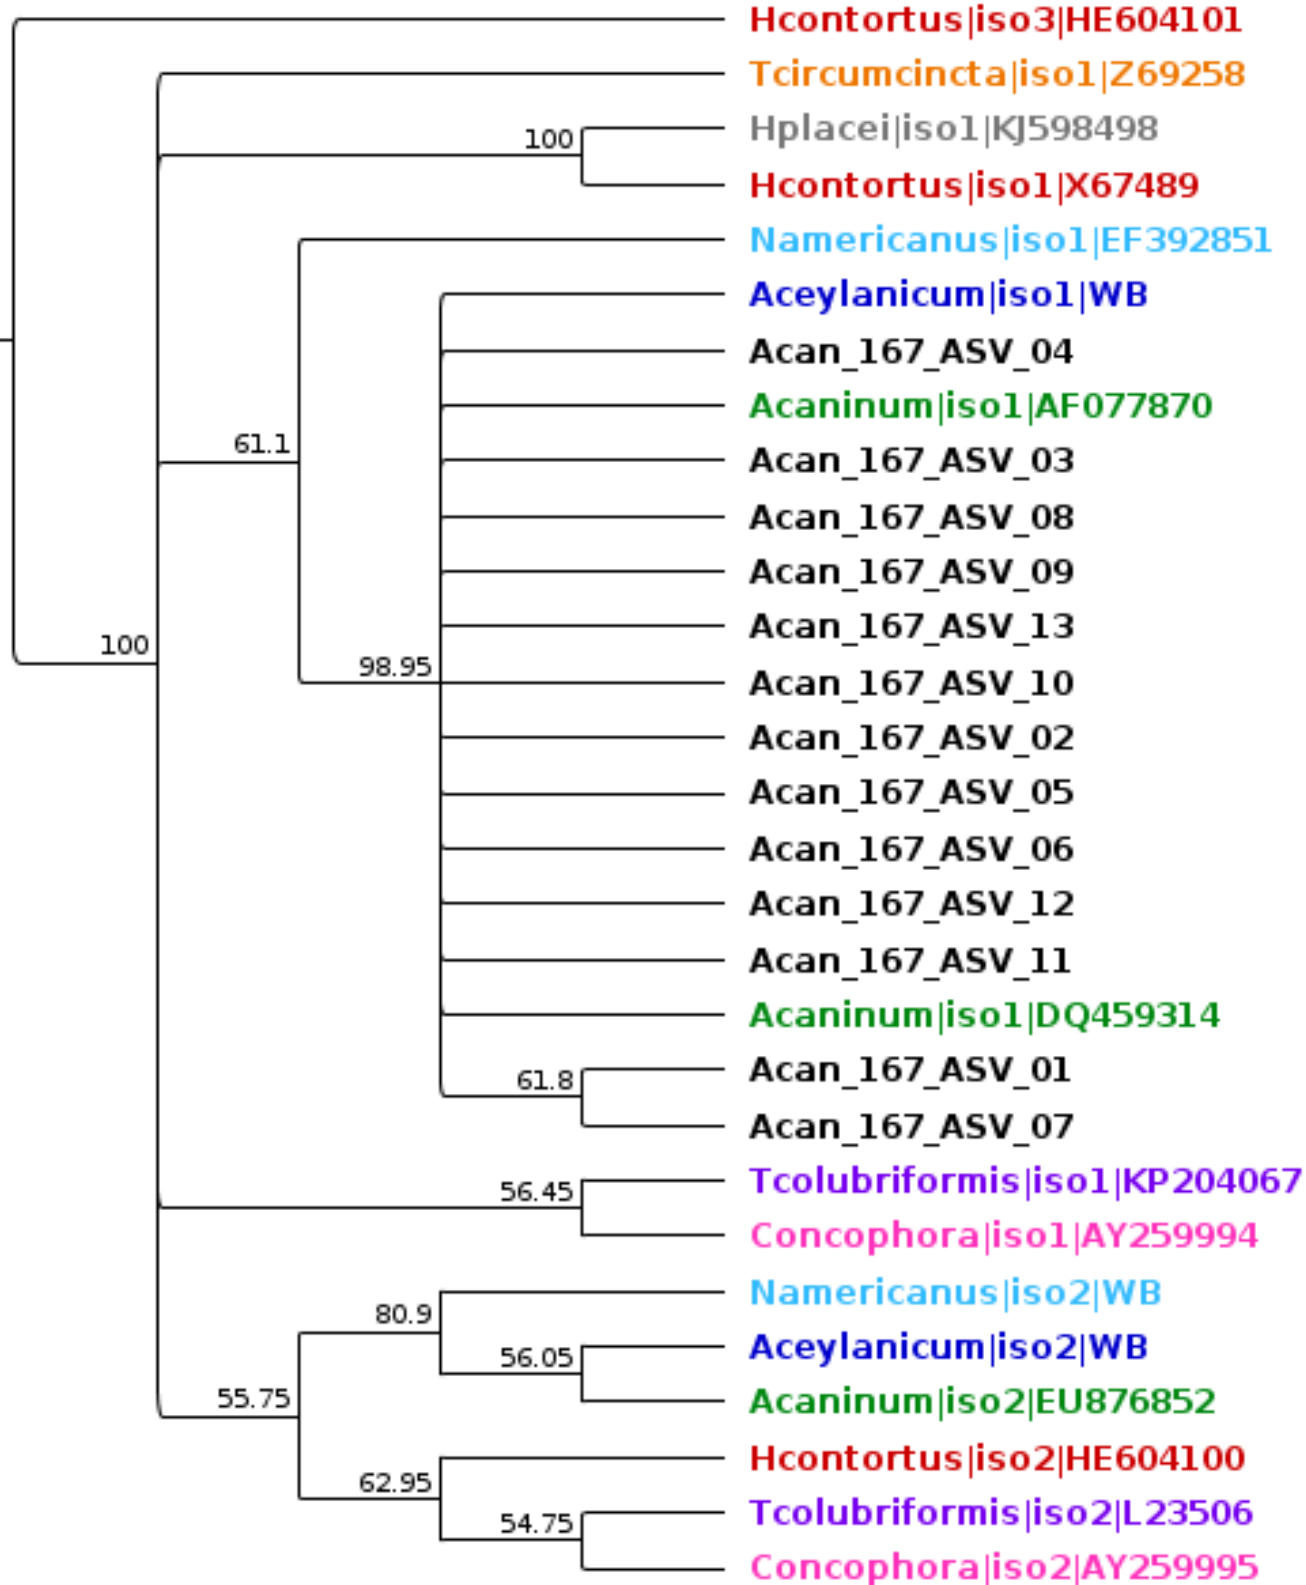

Supplement: mmc2.pdf [file mmc2.pdf]
