# Supplementary figures and images for: Multiple drug resistance in hookworms infecting greyhound dogs in the USA
Source: PubMed Central journal article supplement — Int J Parasitol Drugs Drug Resist. 2021 Sep 2;17:107–17. doi: 10.1016/j.ijpddr.2021.08.005 (PMC8426179; doi:10.1016/j.ijpddr.2021.08.005), 2021-09-02

**Difference**

1.0  
0.8  
0.6  
0.4  
0.2  
0.0  
-0.2  
-0.4  
-0.6  
-0.8  
-1.0

0.00 0.25 0.50 0.75 1.00

**F167Y SNP (mean allele frequency)**

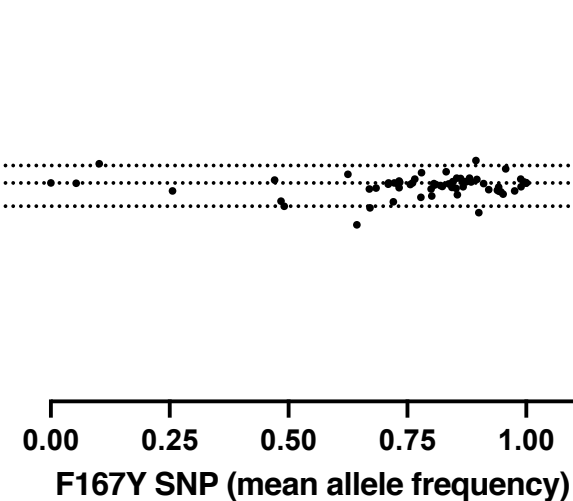

Supplement: mmc1.pdf [file mmc1.pdf]

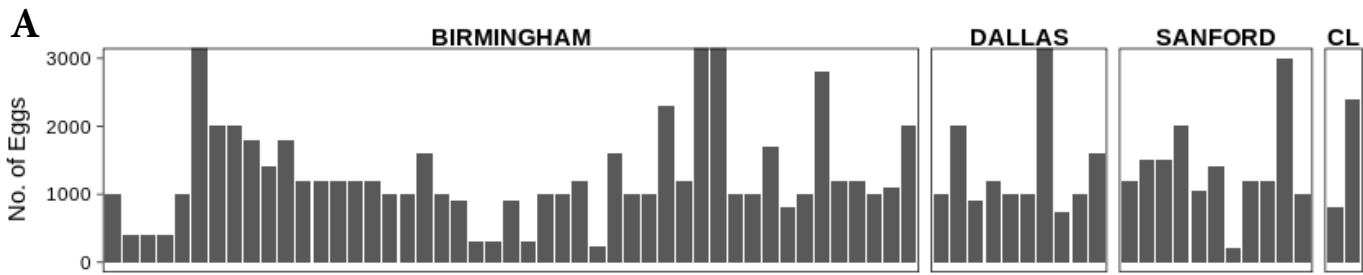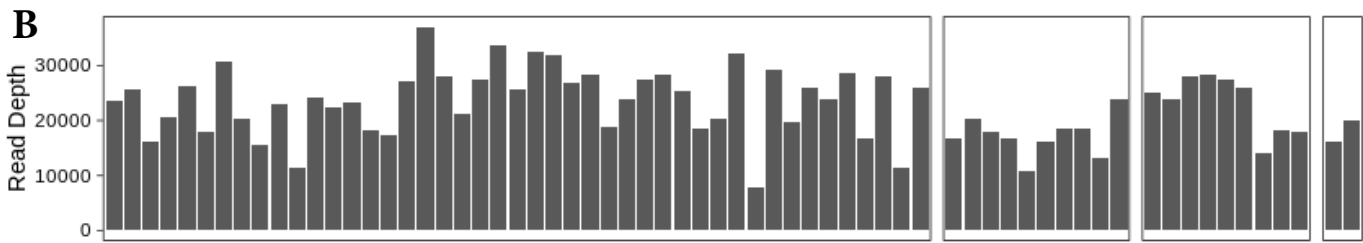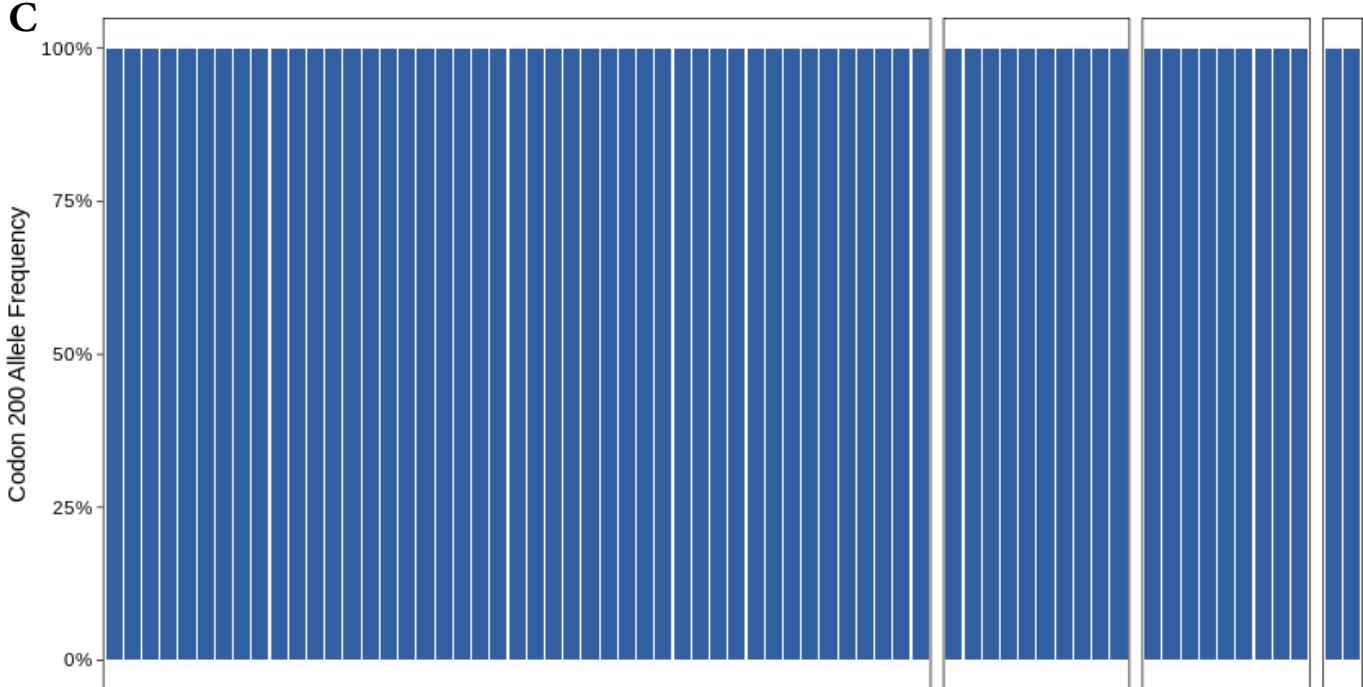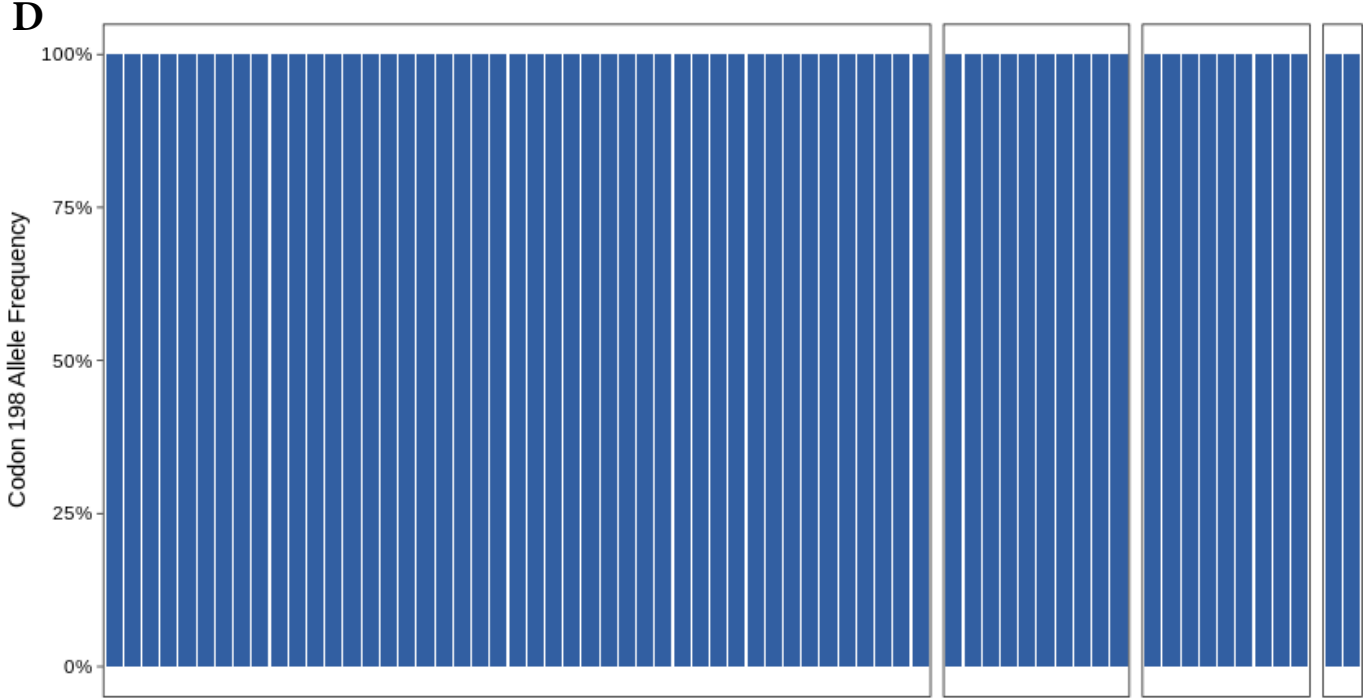

Supplement: mmc4.pdf [file mmc4.pdf]

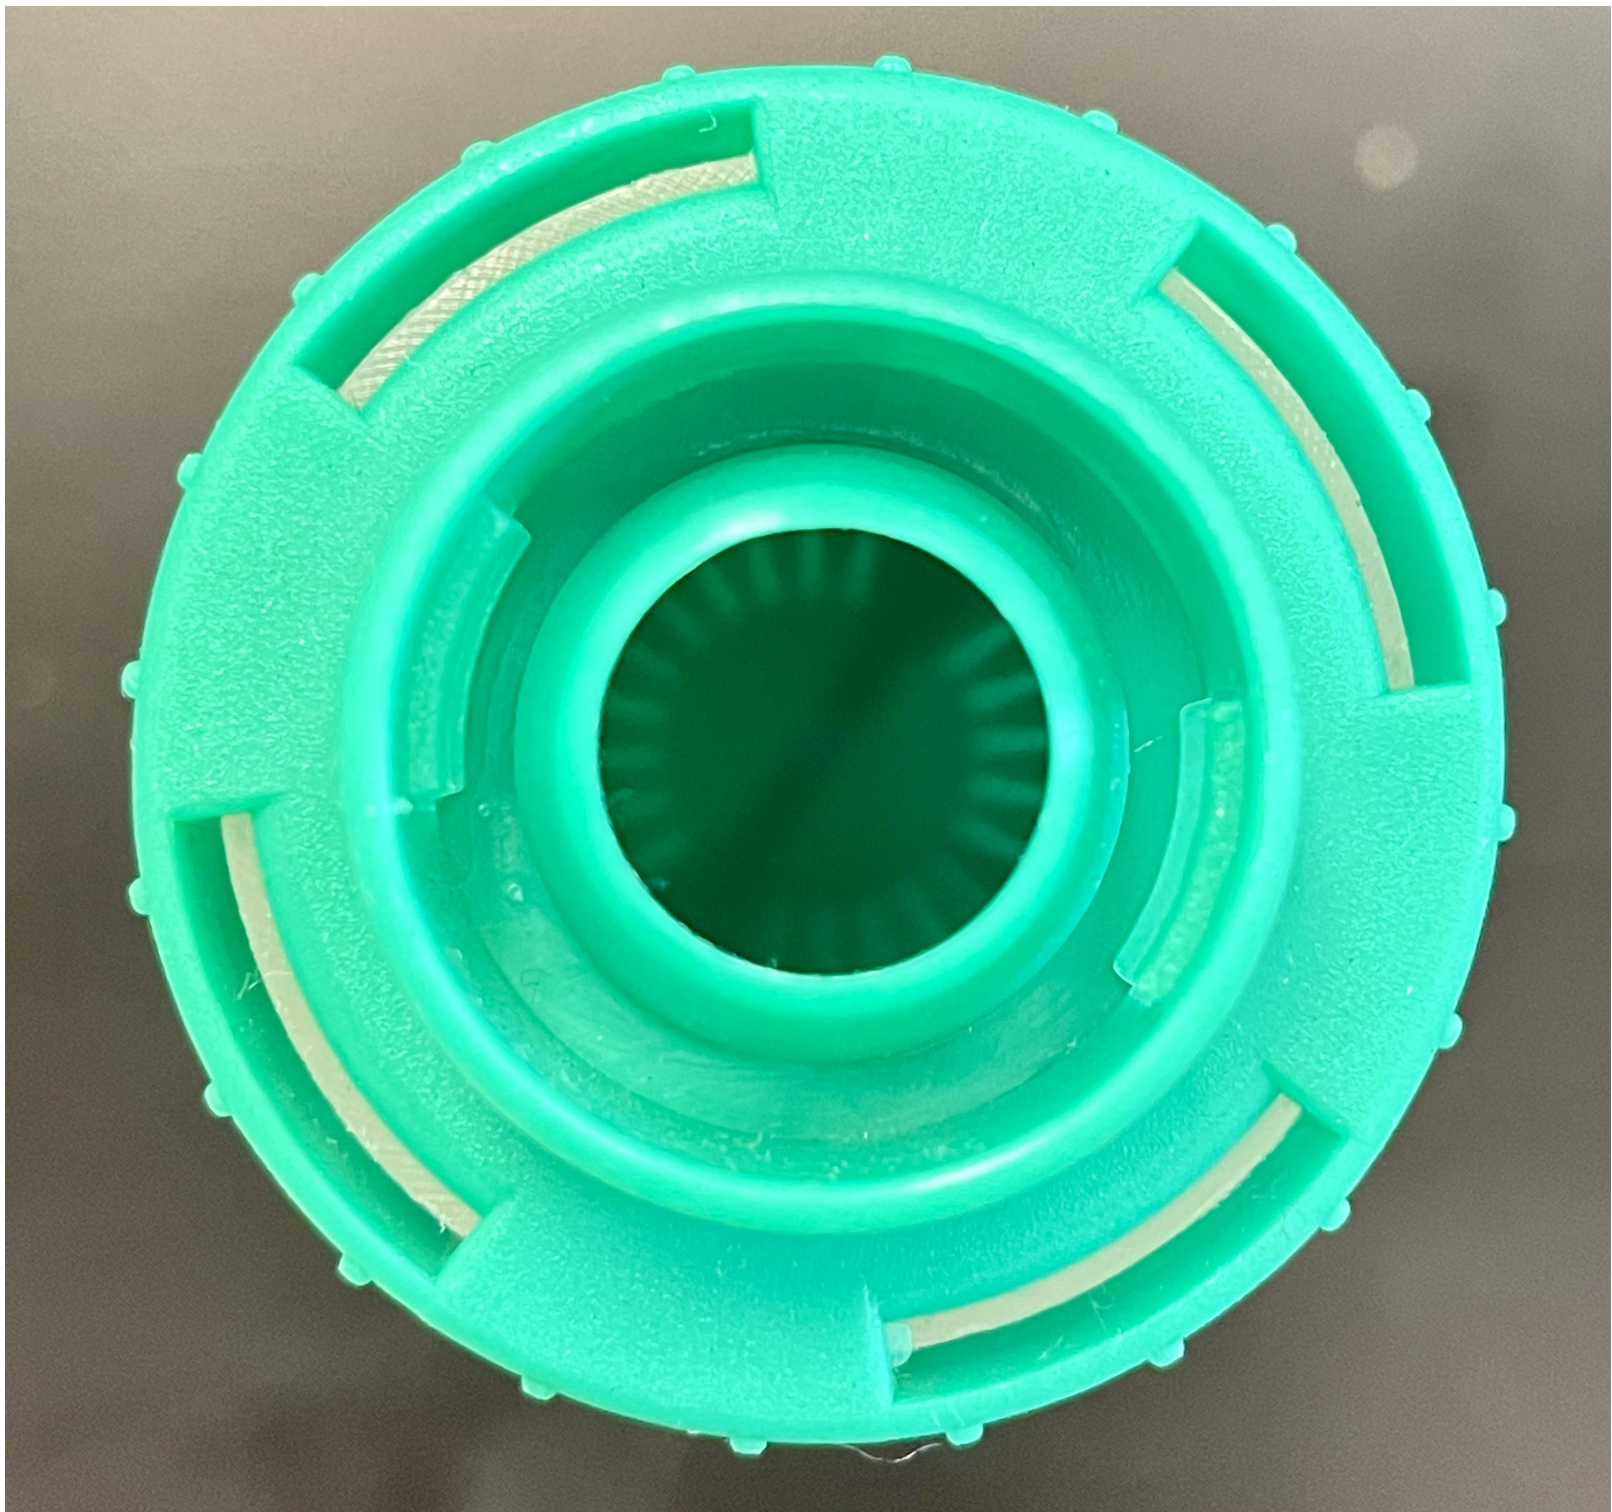

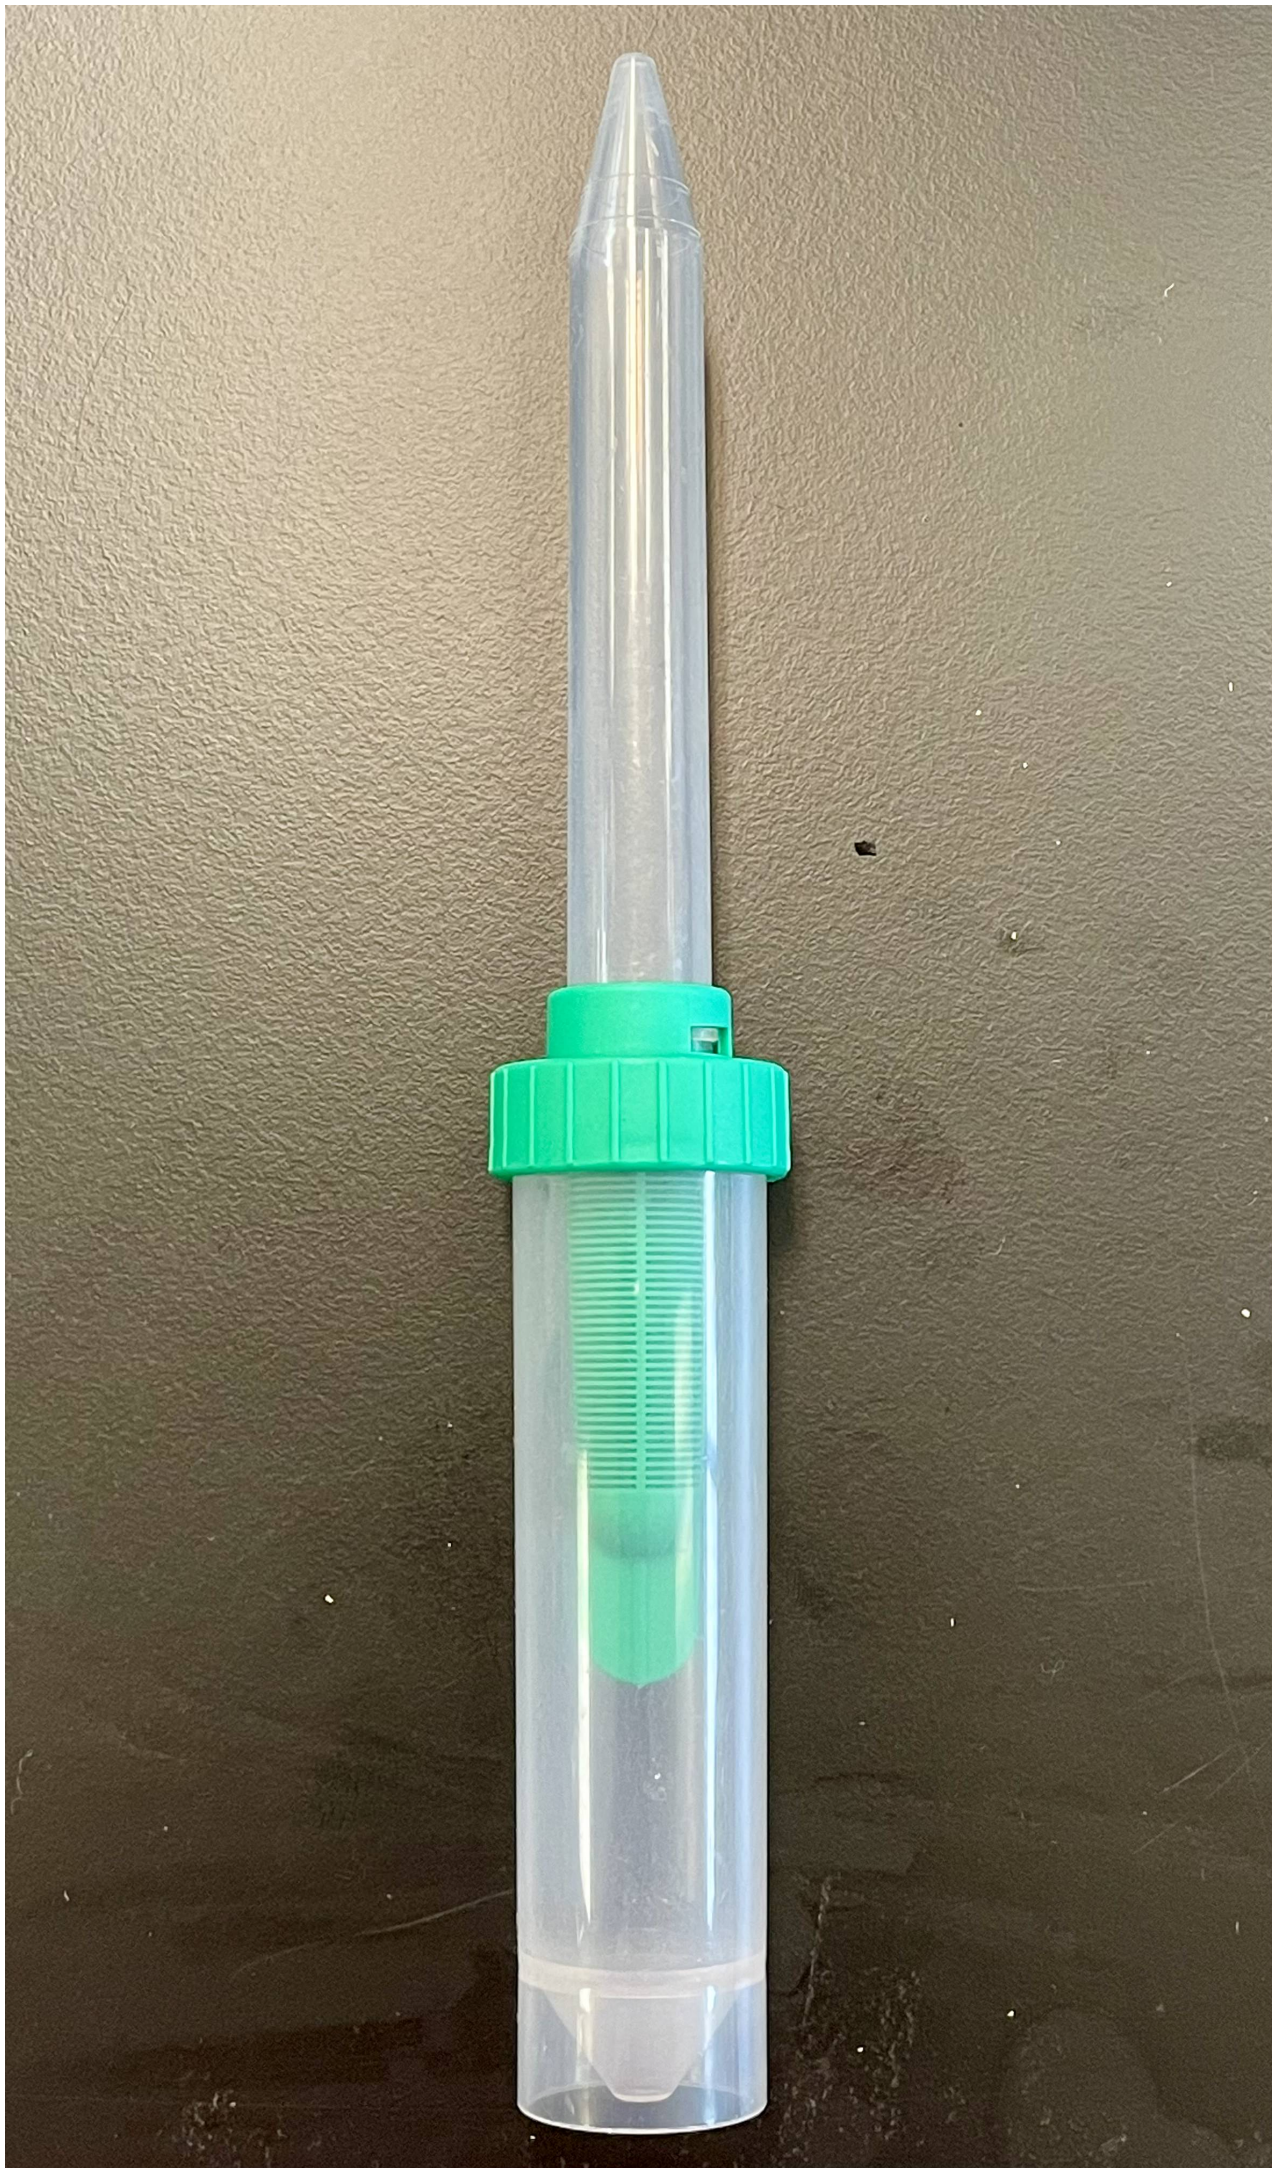

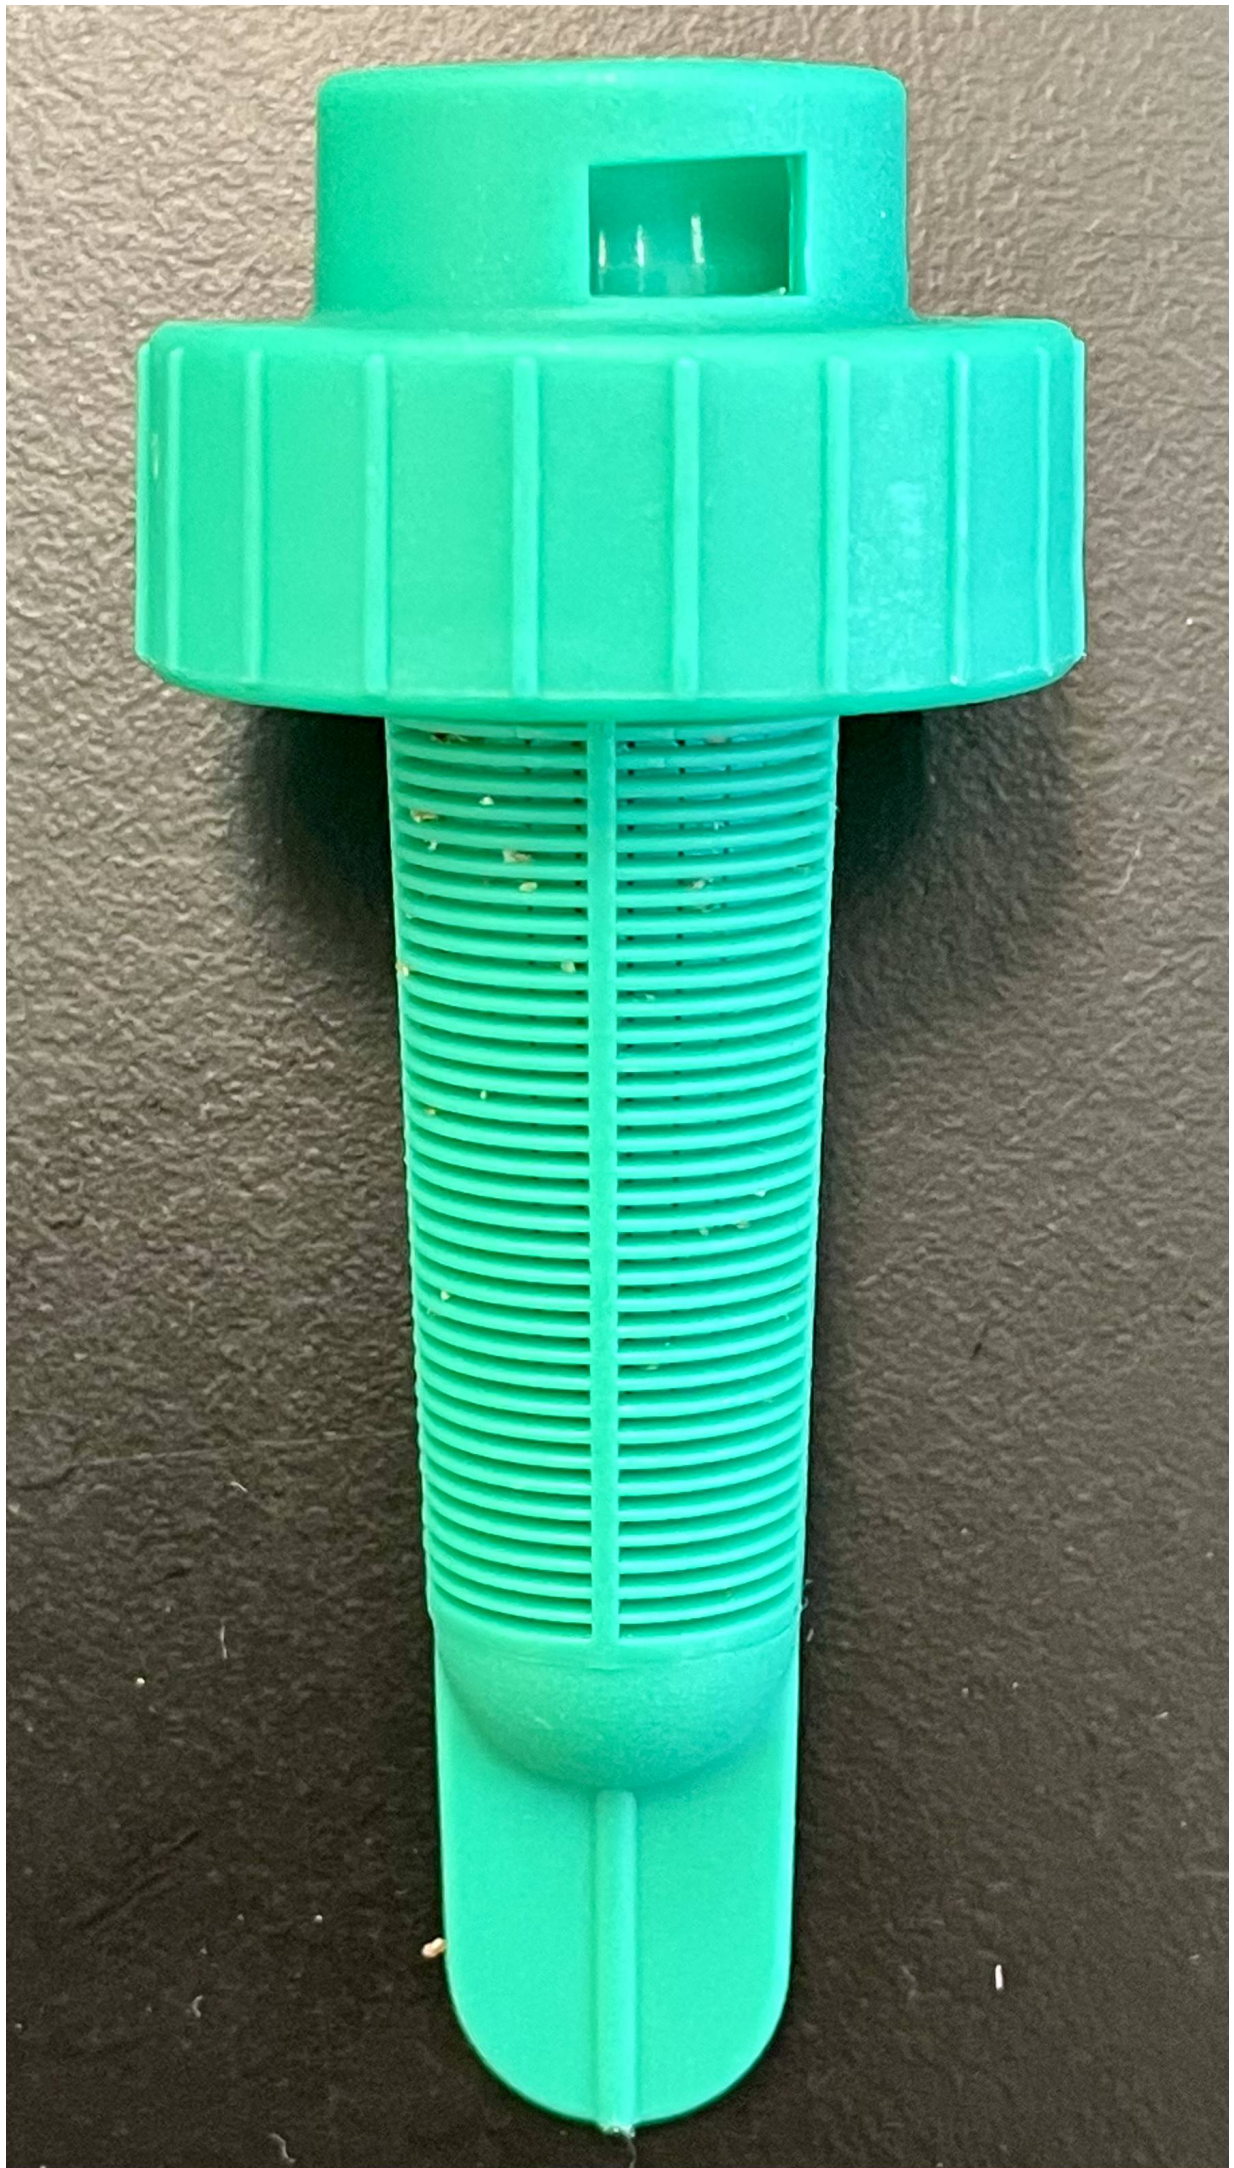

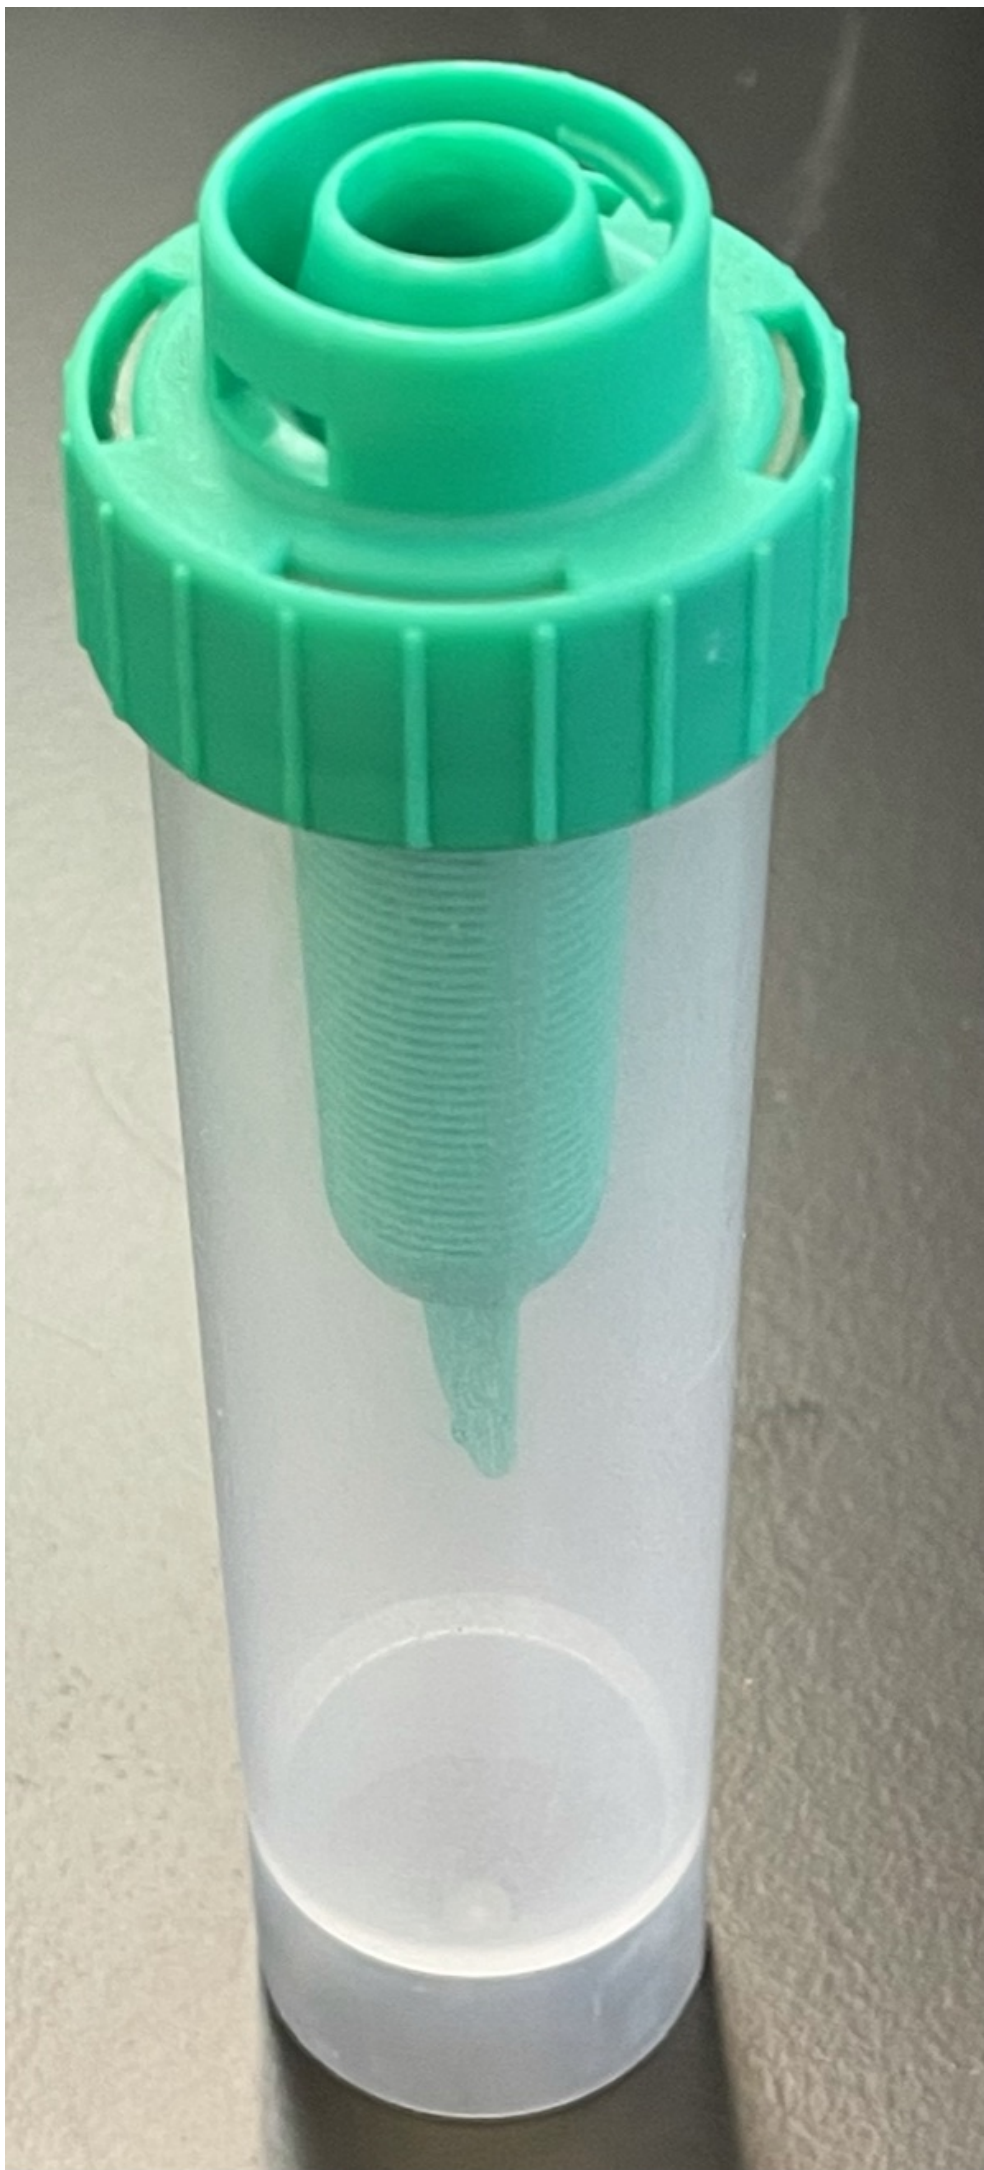

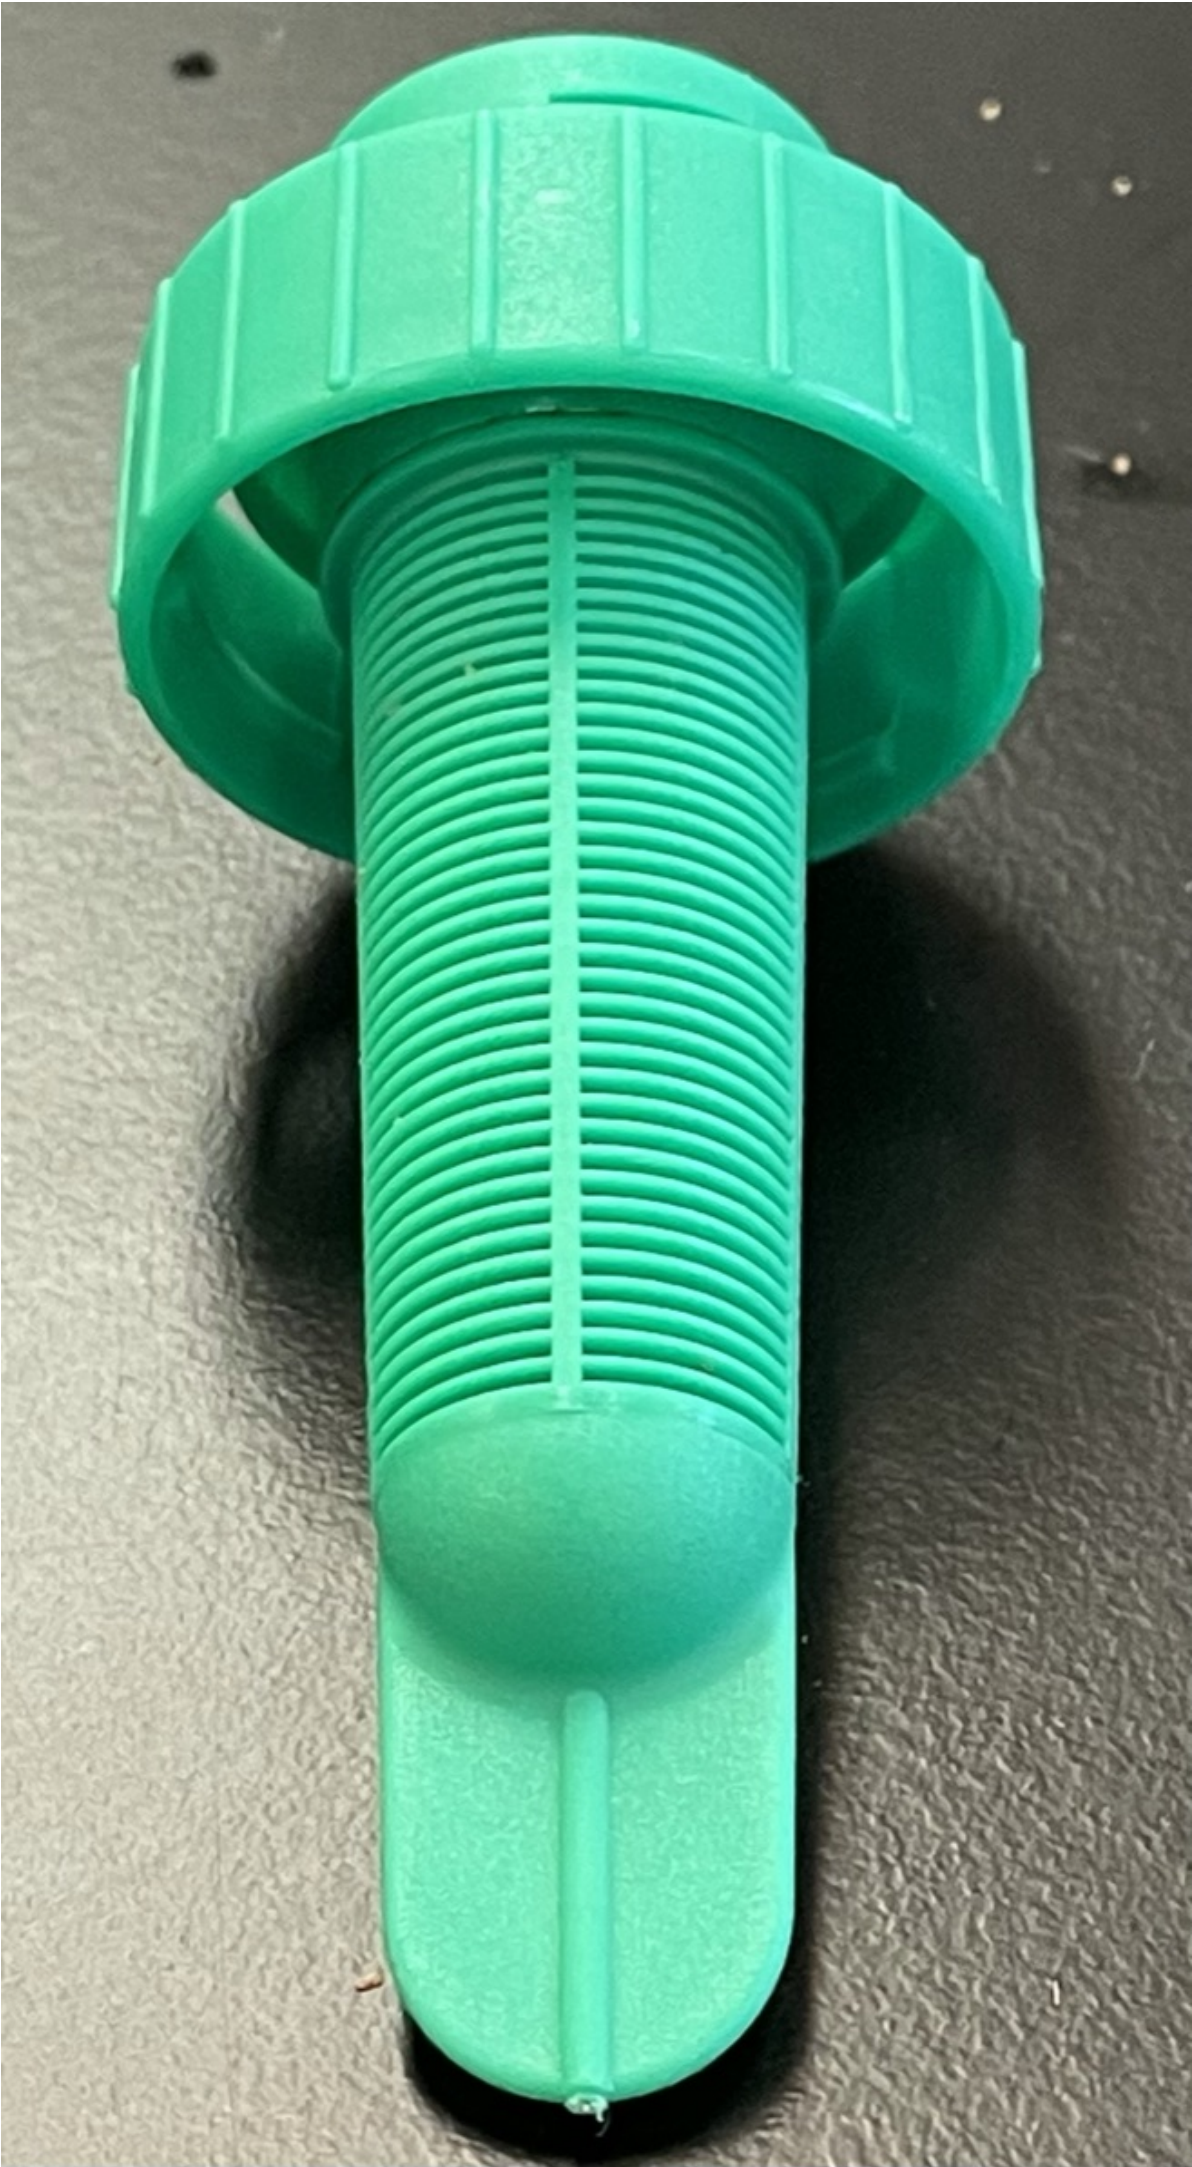

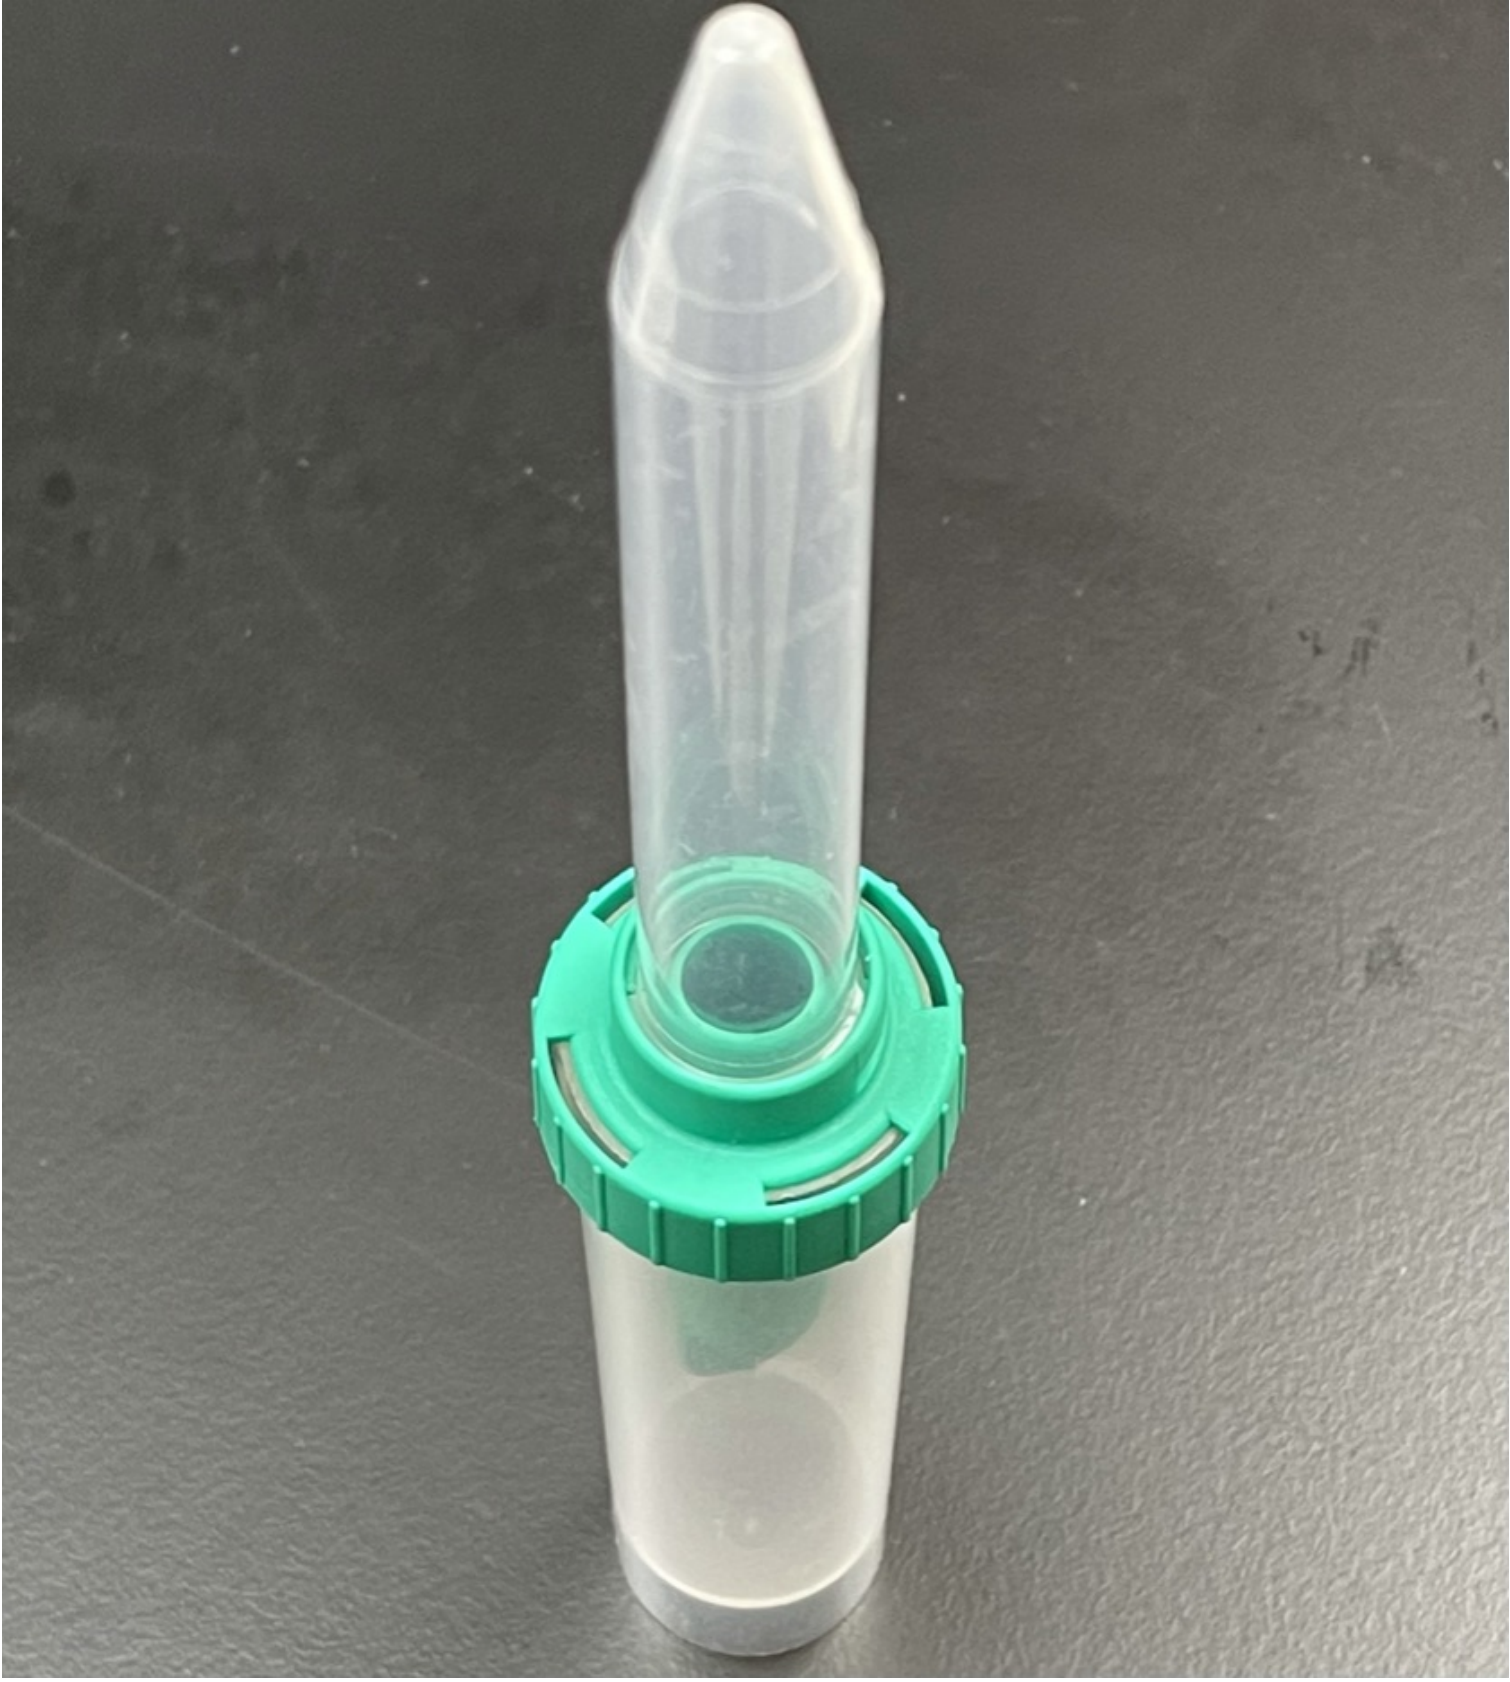

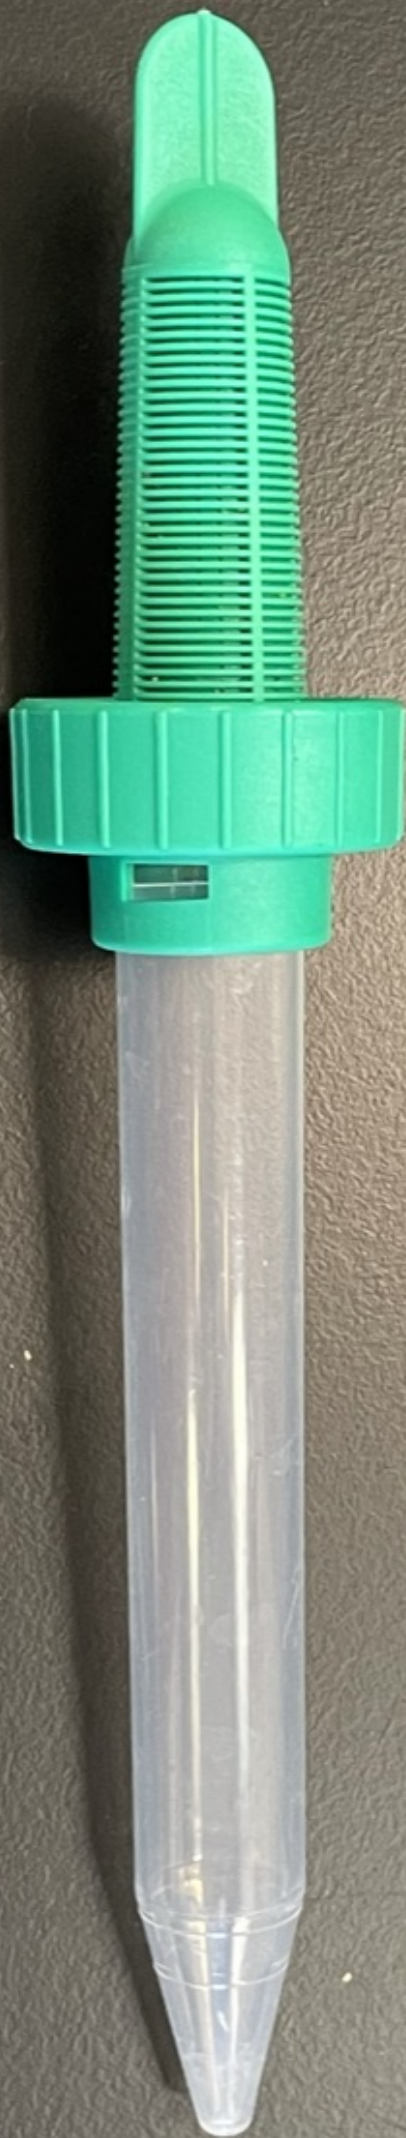

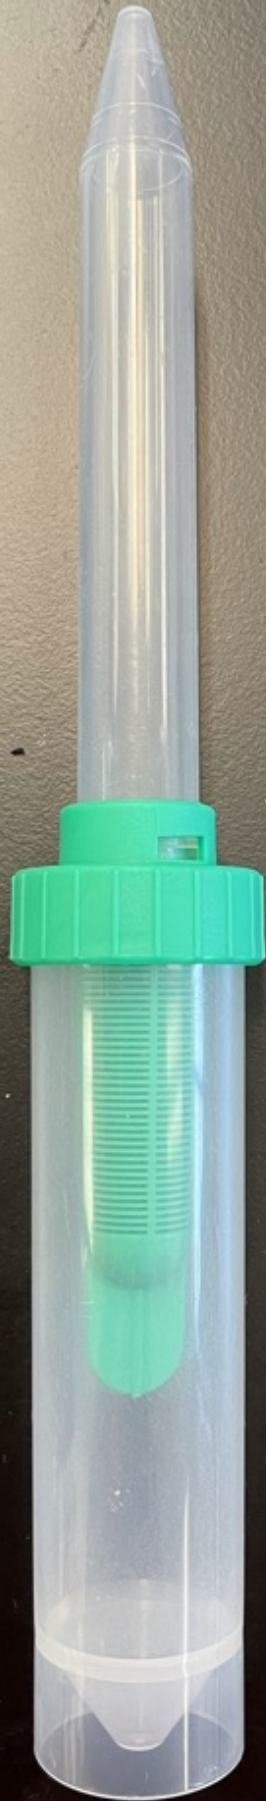

Supplement: mmc5.pdf [file mmc5.pdf]
